# Supplementary material for: Key Role of the Scavenger Receptor MARCO in Mediating Adenovirus Infection and Subsequent Innate Responses of Macrophages
Source: PubMed Central journal article supplement (PMC5539421; doi:10.1128/mbio.00670-17), 2017-08-01
Supplement: mbo003173363sf3.pdf [file mbo003173363sf3.pdf]

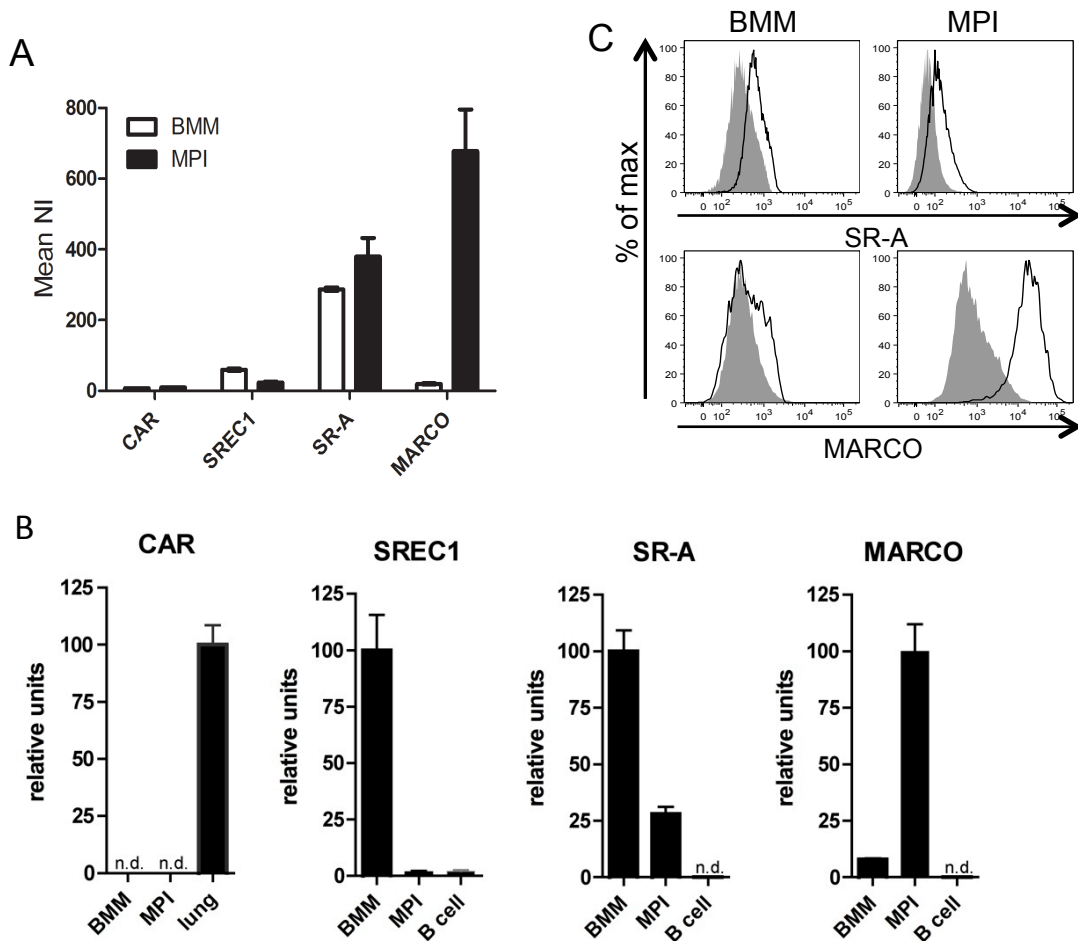

FIG S3. CAR, SREC1, SR-A and MARCO expression in BMM and MPI cells. (A) Comparison of mRNA expression (normalized intensity values; NI) in BMM and MPI cells using microarray data published in (1).

(B) mRNA expression of indicated genes validated by qRT-PCR. Lung and B cell total RNA was used as positive and negative control, respectively. n. d.: not detectable

(C) FACS analysis of SR-A and MARCO expression in BMM and MPI cells. Open histograms: specific antibody, grey filled histograms: isotype control
