# Supplementary material for: Key Role of the Scavenger Receptor MARCO in Mediating Adenovirus Infection and Subsequent Innate Responses of Macrophages
Source: PubMed Central journal article supplement (PMC5539421; doi:10.1128/mbio.00670-17), 2017-08-01
Supplement: mbo003173363sf4.pdf [file mbo003173363sf4.pdf]

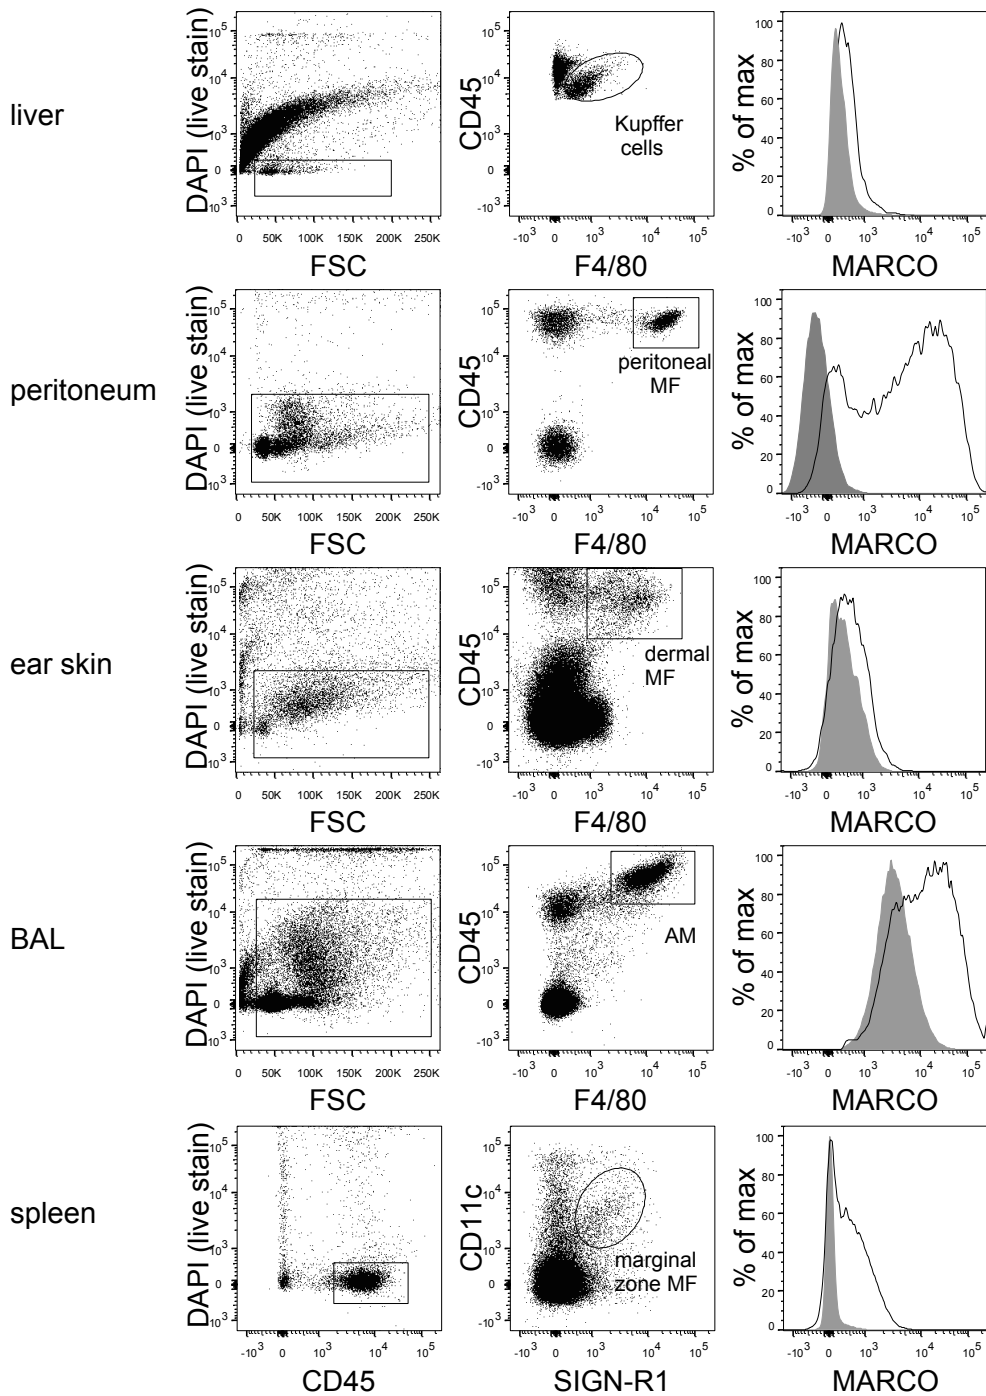

FIG S4. MARCO expression of different tissue macrophages. Macrophages were analyzed immediately after digestion (liver, skin, spleen) or lavage (peritoneum, lung) without prior enrichment by selective adhesion.
