# Supplementary material for: Key Role of the Scavenger Receptor MARCO in Mediating Adenovirus Infection and Subsequent Innate Responses of Macrophages
Source: PubMed Central journal article supplement (PMC5539421; doi:10.1128/mbio.00670-17), 2017-08-01
Supplement: mbo003173363sf6.pdf [file mbo003173363sf6.pdf]

A

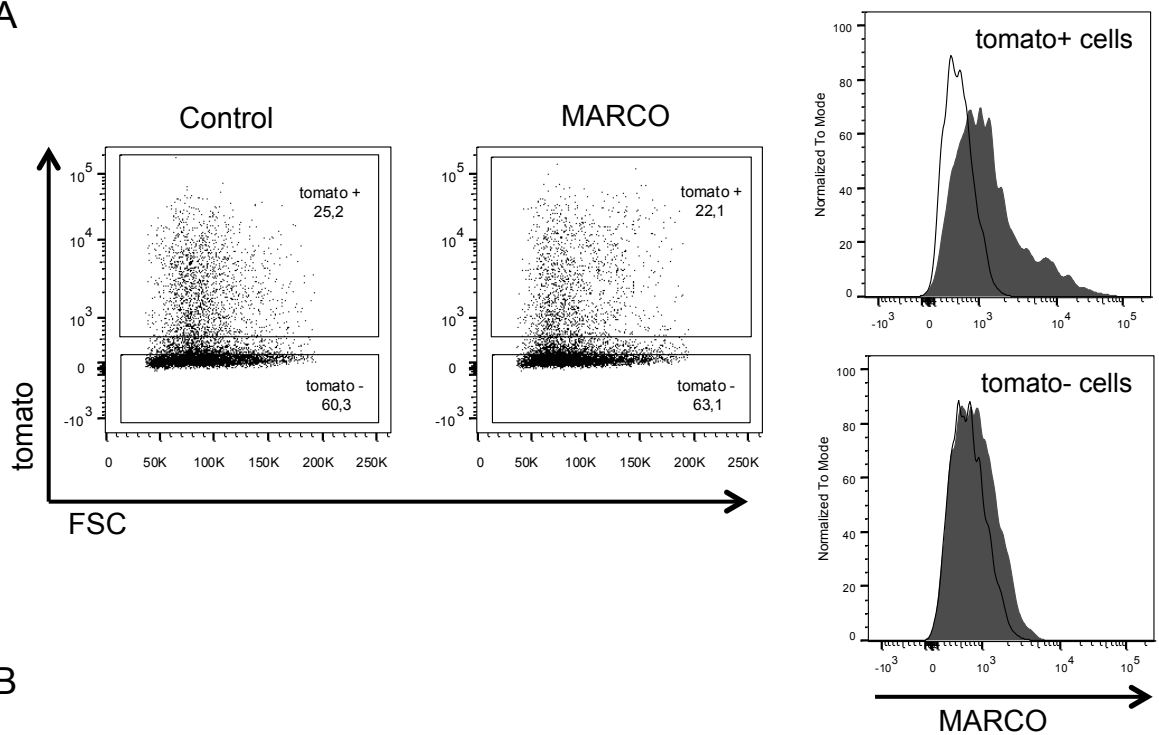

B

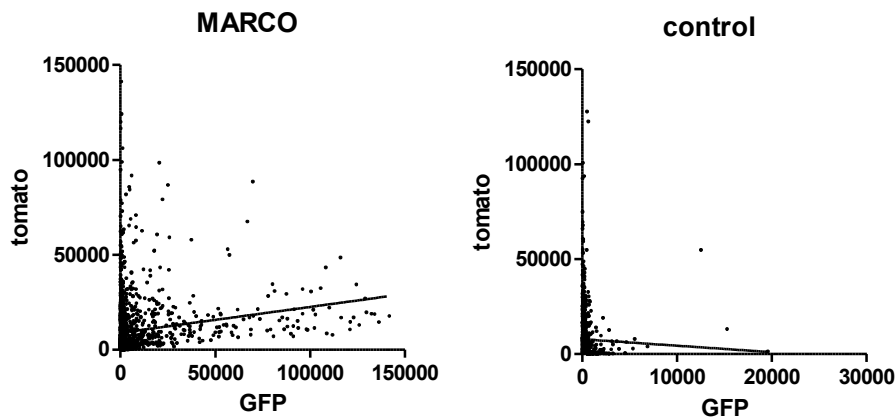

FIG S6. Analysis of transfected RAW264.7 cells. (A) FACS analysis of RAW264.7 cells transfected with MARCO/tomato- or tomato-expressing plasmids. FACS analysis with anti-MARCO was performed 16 h after transfection. Left: Frequencies of tomato+ cells. Right: MARCO staining on tomato+ (top) or tomato- (bottom) cell populations (open histogram: tomato-transfected cells, grey filled histogram: MARCO/tomato-transfected cells). (B) Scatter dot plot of linear regression of AdGFP infected MARCO or control transfected RAW264.7 cells.
